# Supplementary material for: Circular RNA circKIF4A facilitates the malignant progression and suppresses ferroptosis by sponging miR-1231 and upregulating GPX4 in papillary thyroid cancer
Source: publisher site journal article supplement (doi:10.18632/aging.203172), 2021-06-21
Supplement: Supplementary file [file aging-v13i12-203172-supplementary-material-SD1.pdf]

## SUPPLEMENTARY TABLES

**Supplementary Table 1. The target sequences of siRNAs used in this study.**

| siRNA        | Sequence (5' - 3')    |
|--------------|-----------------------|
| si-circCON   | UUCUCCGAACGUGUCACGUTT |
| si-circKIF4A | GAUCUAUAACGUAUUAUATT  |

**Supplementary Table 2. Primer sequences for qRT-PCRs used in this study.**

| Target    | Direction | Sequence (5' - 3')      |
|-----------|-----------|-------------------------|
| 18S       | Forward   | TTAATTCCGATAACGAACGAGA  |
|           | Reverse   | CGCTGAGCCAGTCAGTGTAG    |
| circKIF4A | Forward   | GAGGTACCCTGCCTGGATCT    |
|           | Reverse   | TGGAATCTCTGTAGGGCACA    |
| GPX4      | Forward   | GAGGCAAGACCGAAGTAAACTAC |
|           | Reverse   | CCGAACTGGTTACACGGGAA    |
| miR-1231  | Forward   | CCTCAACTGAATTGCCGACTC   |
|           | Reverse   | CTCAACTGGTGTTCGTGGAGTC  |
| GAPDH     | Forward   | GGAGCGAGATCCCTCCAAAT    |
|           | Reverse   | GGCTGTTGTCATACTTCTCATGG |

**Supplementary Table 3. The sequences of oligonucleotides used in this study.**

| Oligonucleotides | Sequence (5' - 3')       |
|------------------|--------------------------|
| miR-1231 mimics  | GUGUCUGGGCGGACAGCUGC     |
| Control mimics   | UCUACUCUUUCUAGGAGGUUGUGA |
